# Supplementary material
Source: PubMed Central journal article supplement (PMC7190278)

# Supplemental Figure 4

**A**

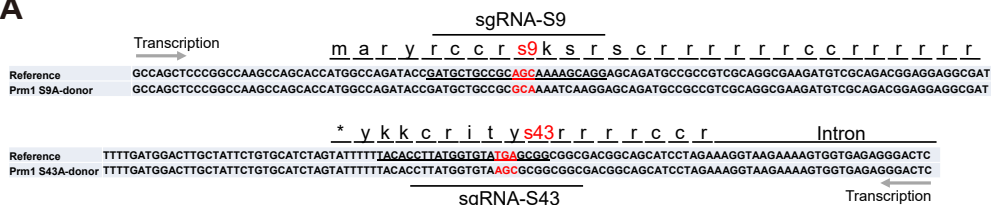

**B**

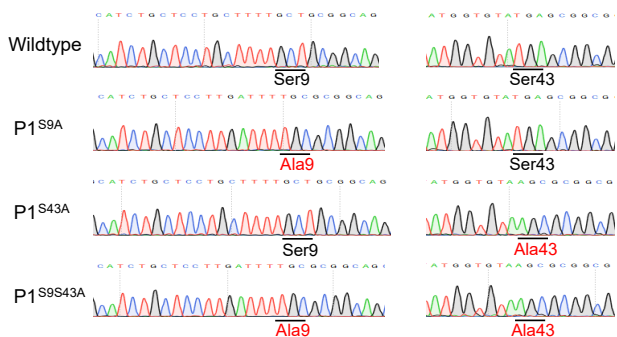

**C**

| Off-targets of sgRNA-S9 |                      |                                 |                      |
|-------------------------|----------------------|---------------------------------|----------------------|
| Genomic location        | Number of mismatches | Sequence (including mismatches) | Genomic location     |
| chr1:184693525          | 3                    | GATGCTGCCICAGAAAAGTGG           | Intergenic           |
| chr10:122535290         | 3                    | tATGCTCCGIAGCAAAGCAGG           | Intergenic           |
| chr11:121470777         | 3                    | CCAGCTTTTGTGCGGCAcCATI          | Tbcd intron          |
| chr13:119474283         | 3                    | CCTGtTTTTGCTGgGGCAcATC          | 4833420G17Rik intron |
| chr16:10796696          | 0                    | CCTGCTTTTGTGCTGGCAGCATC         | On-target Prm1 exon  |
| chr17:87748684          | 3                    | GATGgTGCCiCAGCiAAAGCAGG         | Kenk12 intron        |
| chr3:20111894           | 2                    | CCAGCTTTTGTGCGGCAcCATC          | Hlff intron          |
| chr3:50062784           | 3                    | CCTGCTTTTGTGCGGCAgAaC           | Intergenic           |
| chr5:149834996          | 3                    | GATGgcGCCiCAGCAAAAGCAGG         | Intergenic           |
| chr6:97227239           | 3                    | GATGCaCaGCAGCAAcAGCAGG          | Arl6ip5 Intron       |
| chr7:11829800           | 3                    | GcTGCTCCGCGcGcAAAGCCGG          | Intergenic           |
| chr8:88823911           | 2                    | CCGCTTTTGTGCGGCAcCATC           | Intergenic           |
| chrX:69872154           | 3                    | GATGCTGcAGCAGCAAAgcCAGG         | Intergenic           |

| Off-targets of sgRNA-S43 |                      |                                 |                     |
|--------------------------|----------------------|---------------------------------|---------------------|
| Genomic location         | Number of mismatches | Sequence (including mismatches) | Genomic location    |
| chr11:88348618           | 3                    | TACACCTTATGGTAcATGAcTGG         | Msi2 intron         |
| chr16:10796495           | 0                    | TACACCTTATGGTGTATGAGCGG         | On-target Prm1 exon |
| chrX:145250814           | 3                    | TACAgCTTATGGTtATGATGG           | Intergenic          |

**D**

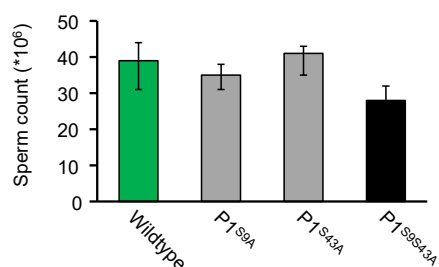

**E**

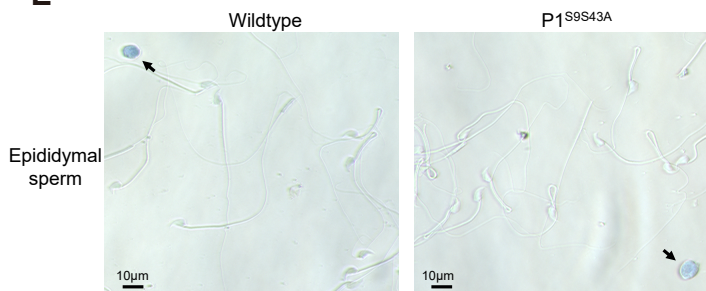

**F**

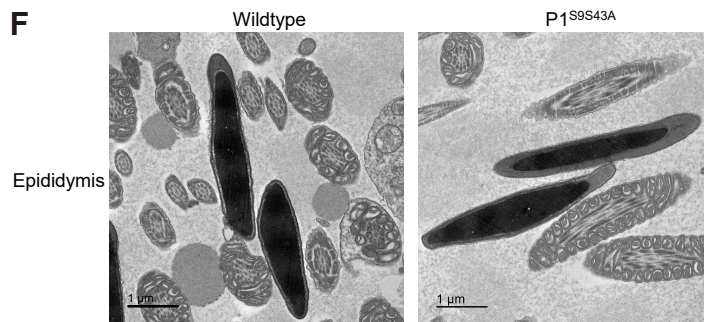

Supplement: NIHMS1569891-supplement-4.pdf [file NIHMS1569891-supplement-4.pdf]
