# Supplementary material
Source: PubMed Central journal article supplement (PMC7190278)

# Supplemental Figure 7

**A**

| Libraries      | Mapped reads | Reads (- ChrM) | Paternal reads | Maternal reads |
|----------------|--------------|----------------|----------------|----------------|
| FE_WT_1        | 48,446,048   | 10,714,740     | 59,234         | 253,632        |
| FE_S9A_1       | 49,779,578   | 15,337,341     | 119,108        | 714,068        |
| FE_S43A_1      | 59,670,036   | 12,004,894     | 20,612         | 169,511        |
| FE_S9S43A_1    | 39,864,702   | 28,306,790     | 146,801        | 1,694,417      |
| FE_WT_2        | 43,058,733   | 9,508,238      | 51,374         | 224,389        |
| FE_S9A_2       | 47,238,989   | 14,480,088     | 110,933        | 671,246        |
| FE_S43A_2      | 56,697,355   | 11,388,056     | 19,515         | 161,155        |
| FE_S9S43A_2    | 36,679,201   | 25,853,676     | 135,762        | 1,573,778      |
| SP_WT          | 20,448,186   | 20,143,728     | NA             | NA             |
| SP_S9A         | 18,096,936   | 17,320,398     | NA             | NA             |
| SP_S43A        | 22,467,993   | 22,189,928     | NA             | NA             |
| SP_S9S43A      | 19,734,947   | 19,333,724     | NA             | NA             |
| FE_siControl_1 | 24,143,410   | 6,132,128      | 254,957        | 260,524        |
| FE_siSRPK1_1   | 34,841,073   | 30,758,198     | 914,844        | 859,691        |
| FE_siControl_2 | 27,634,459   | 7,028,159      | 275,795        | 282,161        |
| FE_siSRPK1_2   | 35,140,562   | 31,410,686     | 909,163        | 852,868        |

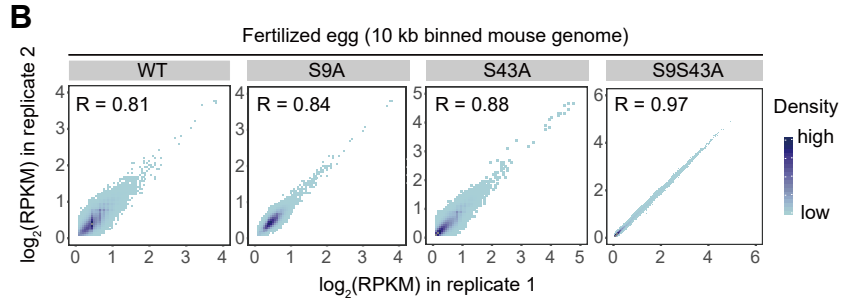

**D**

|                | Total reads      | Maternal Genome (BALB/cJ) |            | Paternal Genome (C57BL/6) |            |
|----------------|------------------|---------------------------|------------|---------------------------|------------|
|                |                  | Reads                     | Percentage | Reads                     | Percentage |
| WT_Mat_reads   | 478,021 (100%)   | 298,342                   | 62.41%     | 72                        | 0.02%      |
| WT_Pat_reads   | 110,608 (100%)   | 39                        | 0.04%      | 81,756                    | 73.92%     |
| S9A_Mat_reads  | 1,385,314 (100%) | 940,839                   | 67.92%     | 113                       | 0.00%      |
| S9A_Pat_reads  | 230,041 (100%)   | 121                       | 0.05%      | 121,679                   | 52.89%     |
| S43A_Mat_reads | 330,666 (100%)   | 238,195                   | 72.03%     | 19                        | 0.00%      |
| S43A_Pat_reads | 40,127 (100%)    | 57                        | 0.14%      | 11,488                    | 28.63%     |
| DM_Mat_reads   | 3,268,195 (100%) | 2,298,752                 | 70.34%     | 72                        | 0.00%      |
| DM_Pat_reads   | 282,563 (100%)   | 283                       | 0.10%      | 139,229                   | 49.27%     |

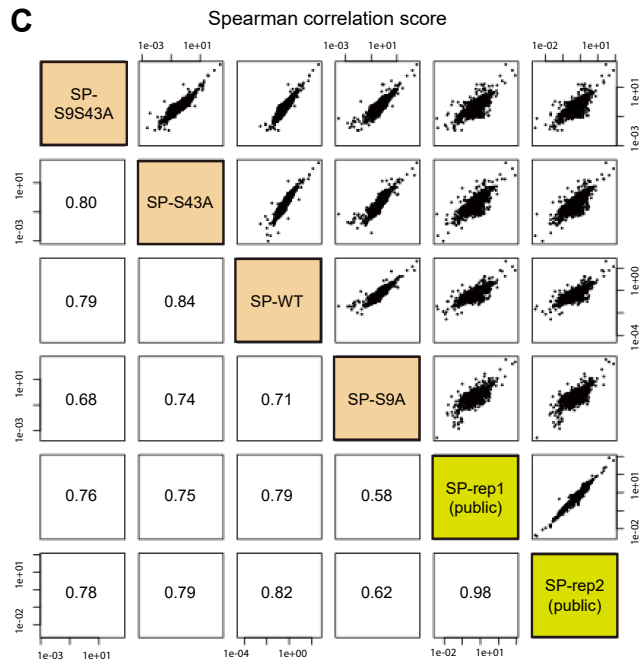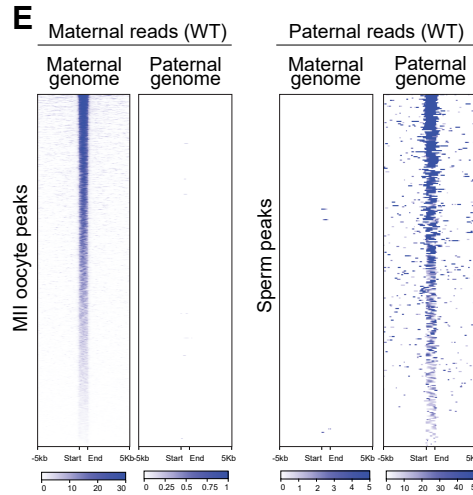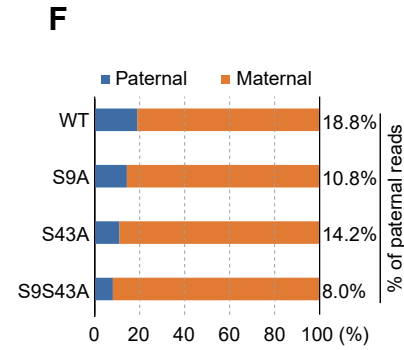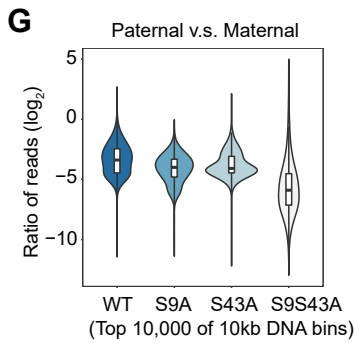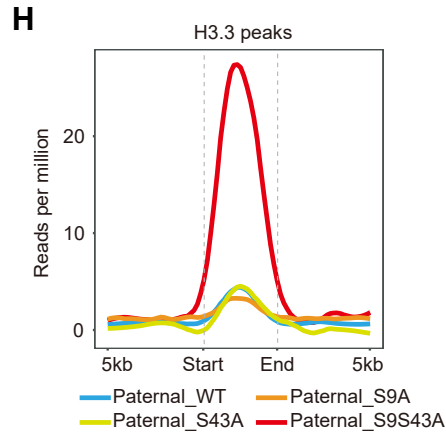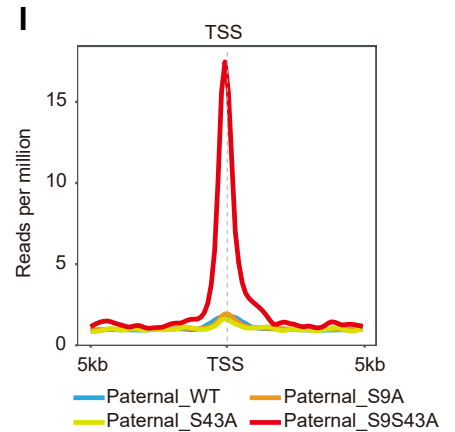

Supplement: NIHMS1569891-supplement-7.pdf [file NIHMS1569891-supplement-7.pdf]
