# Supplementary material
Source: PubMed Central journal article supplement (PMC7190278)
Supplement: NIHMS1569891-supplement-2.pdf [file NIHMS1569891-supplement-2.pdf]

## Supplemental Figure 2

**A**

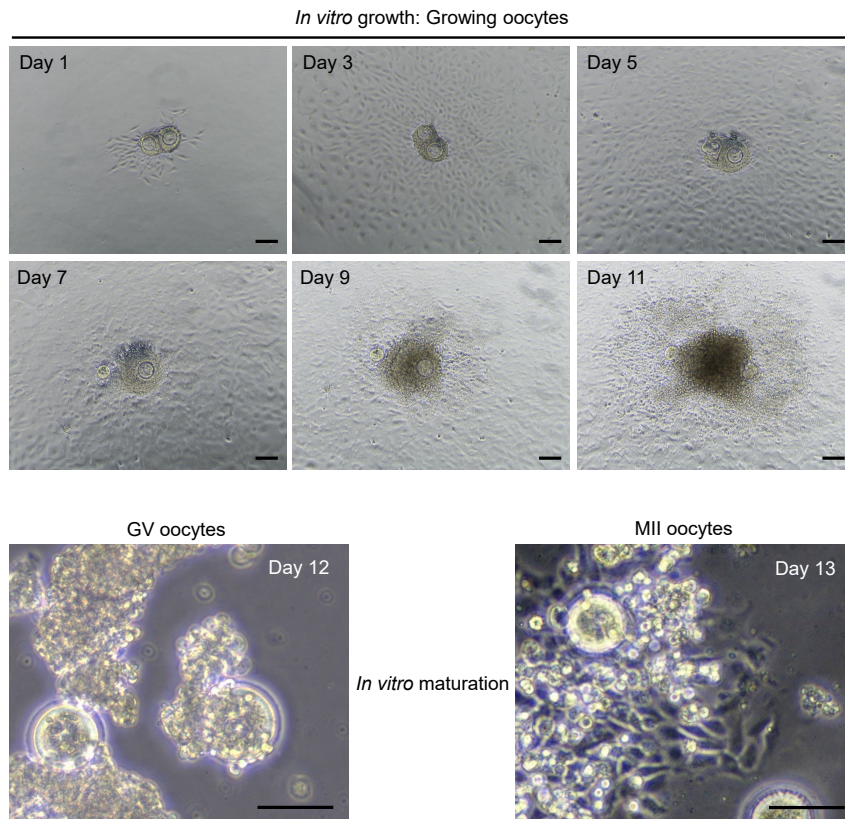

**B**

|                                    | Scr siRNA    | SRPK1 siRNA  | SRPK1 siRNA<br>+<br>hSRPK1<br>mRNA | SRPK1 siRNA<br>+<br>hSRPK1<br>mRNA (KD) |
|------------------------------------|--------------|--------------|------------------------------------|-----------------------------------------|
| <b>A:</b> Injected growing oocytes | 78           | 101          | 88                                 | 85                                      |
| <b>B:</b> MII oocytes              | 69 (88%)     | 82 (81%)     | 74 (84%)                           | 67 (79%)                                |
| <b>C:</b> 1-Cell Zygote            | 54 (78%)     | 65 (79%)     | 62 (83%)                           | 46 (69%)                                |
| <b>D:</b> 2-Cell Embryo            | 43           | 9            | 35                                 | 8                                       |
| <b>E:</b> 2-Cell/1-Cell Zygote (%) | <b>79.6%</b> | <b>13.8%</b> | <b>56.5%</b>                       | <b>17%</b>                              |
