# Supplementary material
Source: PubMed Central journal article supplement (PMC7190278)
Supplement: NIHMS1569891-supplement-8.pdf [file NIHMS1569891-supplement-8.pdf]

**Supplementary Materials for**  
**Initiation of Parental Genome Reprogramming in Fertilized Oocyte by**  
**Splicing Kinase SRPK1-Catalyzed Protamine Phosphorylation**

Lan-Tao Gou, Do-Hwan Lim, Wubin Ma, Brandon E. Aubol, Yajing Hao, Xin Wang, Jun Zhao, Zhengyu Liang, Changwei Shao, Xuan Zhang, Fan Meng, Hairi Li, Xiaorong Zhang, Ruiming Xu, Dangsheng Li, Michael G. Rosenfeld, Pamela L. Mellon, Joseph A. Adams, Mo-Fang Liu, and Xiang-Dong Fu

**Table S1.** Chemically synthesized peptides used in this study, Related to [Figure 3](#) and [Figure S3](#)

| <b>Protamine peptides</b> |                                                     |
|---------------------------|-----------------------------------------------------|
| P1 #1                     | MARYCCRSKSRSRCRRRRRRRCRRRRRRCCRRRRRRCCRRRRSYTIRCKKY |
| P1 #2                     | MARYCCRAKSRSRCRRRRRRRCRRRRRRCCRRRRRRCCRRRRSYTIRCKKY |
| P1 #3                     | MARYCCRSKARSRCRRRRRRRCRRRRRRCCRRRRRRCCRRRRSYTIRCKKY |
| P1 #4                     | MARYCCRSKSRARCRRRRRRRCRRRRRRCCRRRRRRCCRRRRSYTIRCKKY |
| P1 #5                     | MARYCCRSKSRSRCRRRRRRRCRRRRRRCCRRRRRRCCRRRRAYTIRCKKY |
| P1 #6                     | MARYCCRAKSRSRCRRRRRRRCRRRRRRCCRRRRRRCCRRRRAYTIRCKKY |
| P2 #1                     | MVRYRMRSPPSEGP HQPGDHEREEQGQGLSPERVEDYGRTHRGHHHH    |
| P2 #2                     | MVRYRMRAPEGP HQPGDHEREEQGQGLSPERVEDYGRTHRGHHHH      |
| P2 #3                     | RHRRCSRKRLHRIHKRRRSCRRRRRHSCRH                      |
| P2 #4                     | RHRRCSRKRLHRIHKRRRACRRRRRHSCRH                      |
| P2 #5                     | RRRHRRGCRRSRRRRRCRCRKCRHHH                          |
| P2 #6                     | RRRHRRGCRRARRRRRCRCRKCRHHH                          |

**Table S2.** Synthesized oligonucleotides used in this study, Related to [Figure 4](#), [Figure S4](#) and [S5](#)

| <b>crRNAs, donor DNAs, and tracrRNA</b>   |                                                                                                                                   |
|-------------------------------------------|-----------------------------------------------------------------------------------------------------------------------------------|
| P1 S9-crRNA                               | 5'-GAUGCUGCCGCAGCAAAAGC-3'                                                                                                        |
| P1 S43-crRNA                              | 5'-UACACCUUAUGGUGUAUGAG-3'                                                                                                        |
| P1 S9A-donor                              | 5'-<br>GCCAGCTCCCGGCCAAGCCAGCACCATGGCCAGATAACCGATGCTGCC<br>GCgcaAAATCAAGGAGCAGATGCCGCCGTCGCAGGCGAAGATGTCGCA<br>GACGGAGGAGGCGAT-3' |
| P1 S43A-donor                             | 5'-<br>TTTTGATGGACTTGCTATTCTGTGCATCTAGTATTTTTTACACCTTATG<br>GTGTAagcGCGGCGGCGACGGCAGCATCCTAGAAAGGTAAGAAAAGTG<br>GTGAGAGGGACTC-3'  |
| tracrRNA                                  | 5'-<br>AAACAGCAUAGCAAGUAAAAUAAGGCUAGUCCGUUAUCAACUUGA<br>AAAAGUGGCACCGAGUCGGUGCU-3'                                                |
| <b>Cy3 labeled sense oligonucleotides</b> |                                                                                                                                   |
| Sense-25nt                                | 5'-/Cy3/GTGACACCAGGAAAACCAATTCT-3'                                                                                                |
| Sense-50nt                                | 5'-<br>/Cy3/GCCCTTATTTGCACACTGGGAGGGCGTGACACCAGGAAAACCAC<br>AATTCT-3'                                                             |
| Sense-100nt                               | 5'-<br>/Cy3/TTAGGATAGAAGCACCAGGGGACCCACGAACGGTGTGTCGTCGAA<br>ACAGCAGCCCTTATTTGCACACTGGGAGGGCGTGACACCAGGAAAAC<br>CACAATTCT-3'      |
| <b>Antisense oligonucleotides</b>         |                                                                                                                                   |
| Antisense-25nt                            | 5'-AGAATTGTGGTTTTCTGGTGTCAC-3'                                                                                                    |
| Antisense-50nt                            | 5'-<br>AGAATTGTGGTTTTCTGGTGTCACGCCCTCCAGTGTGCAAATAAGG<br>GC-3'                                                                    |
| Antisense-100nt                           | 5'-<br>AGAATTGTGGTTTTCTGGTGTCACGCCCTCCAGTGTGCAAATAAGG<br>GCTGCTGTTTCGACGACACCGTTCGTGGGGTCCCCTGGTGCTTCTATCC<br>TAA-3'              |
