# Supplementary material
Source: PubMed Central journal article supplement (PMC7190278)

# Supplemental Figure 1

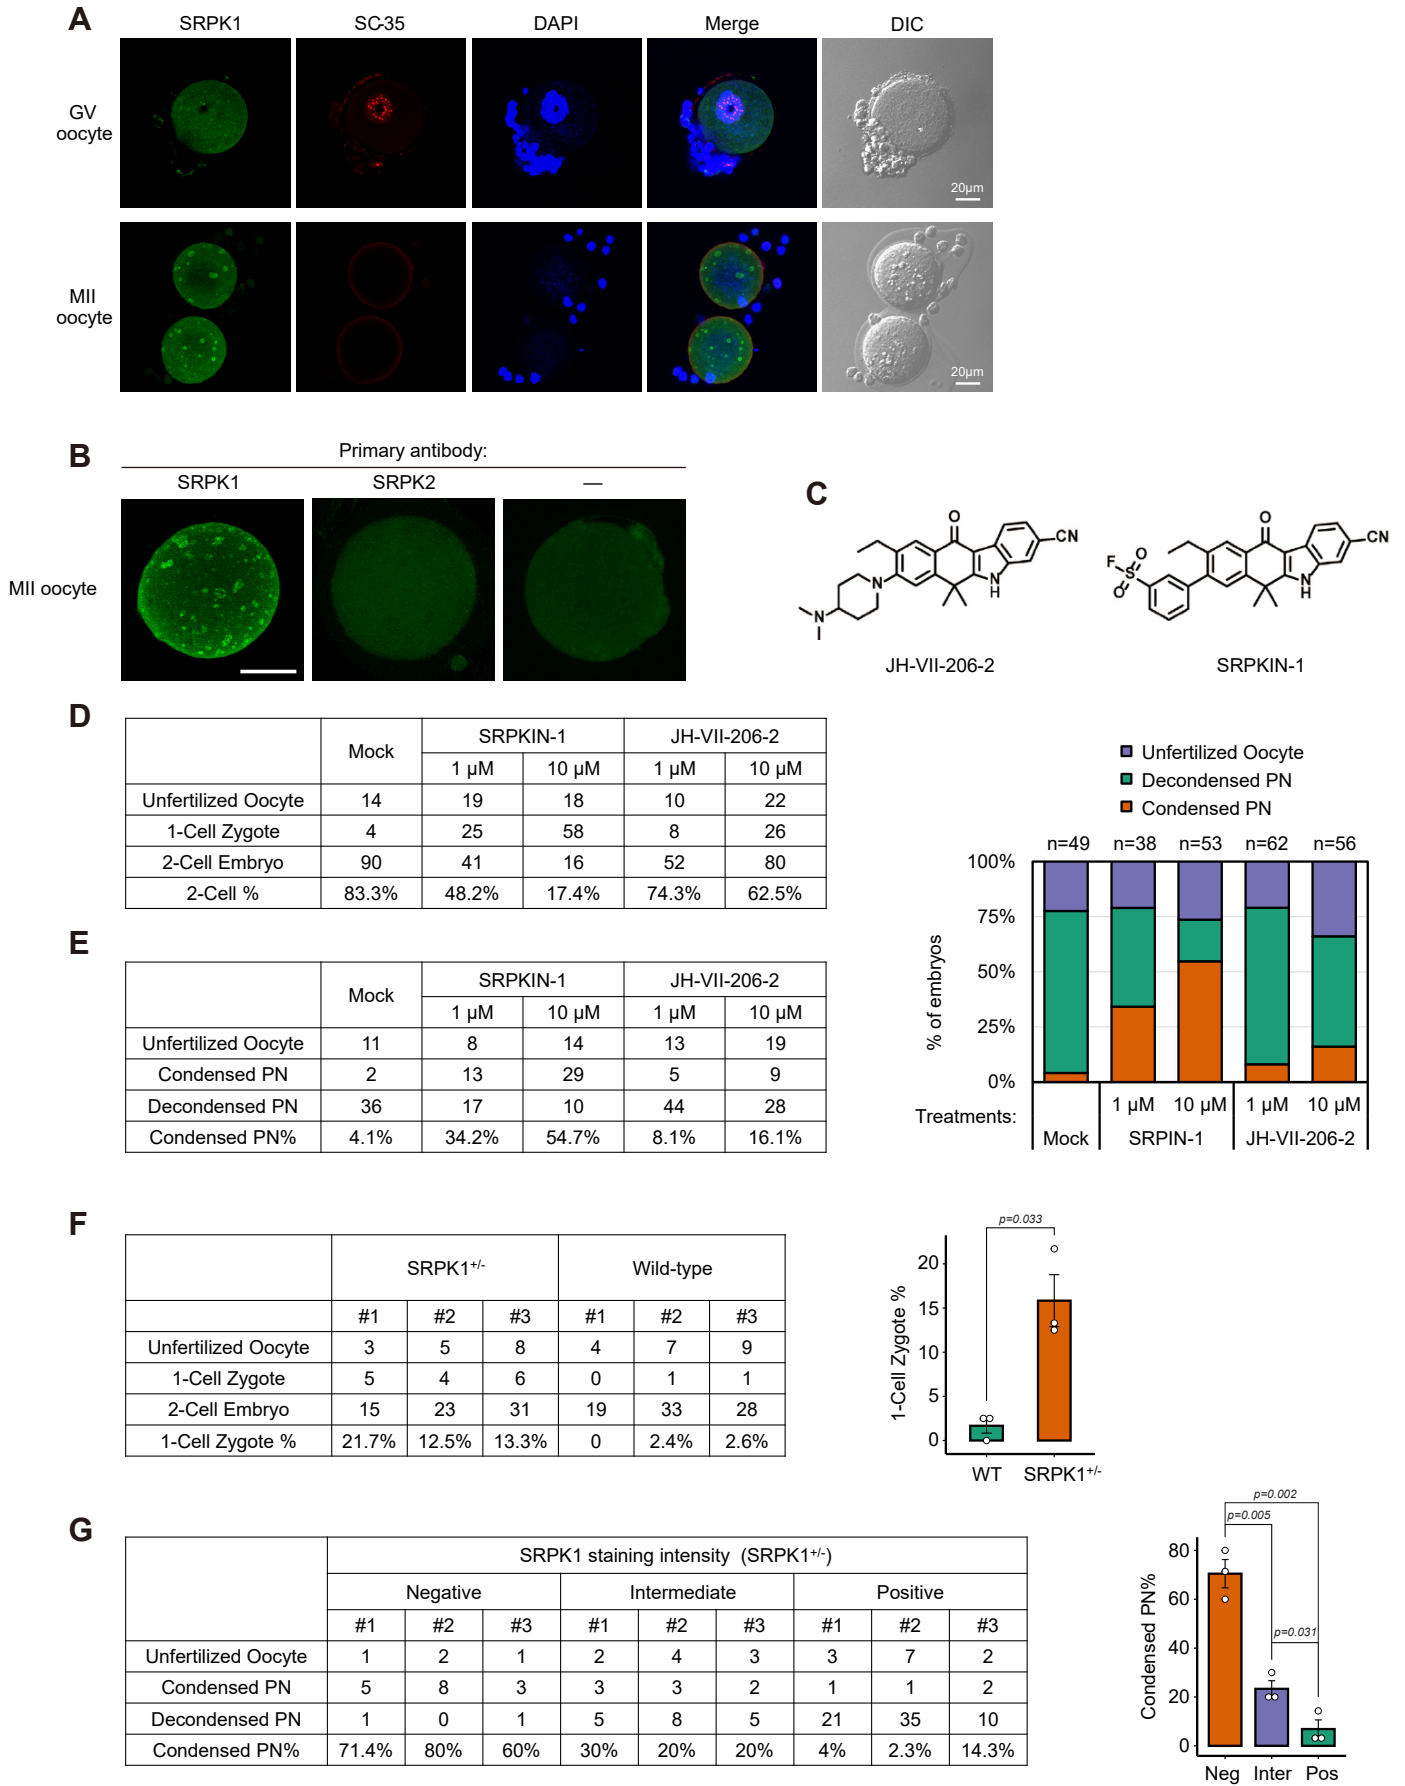

Supplement: NIHMS1569891-supplement-1.pdf [file NIHMS1569891-supplement-1.pdf]

# Supplemental Figure 3

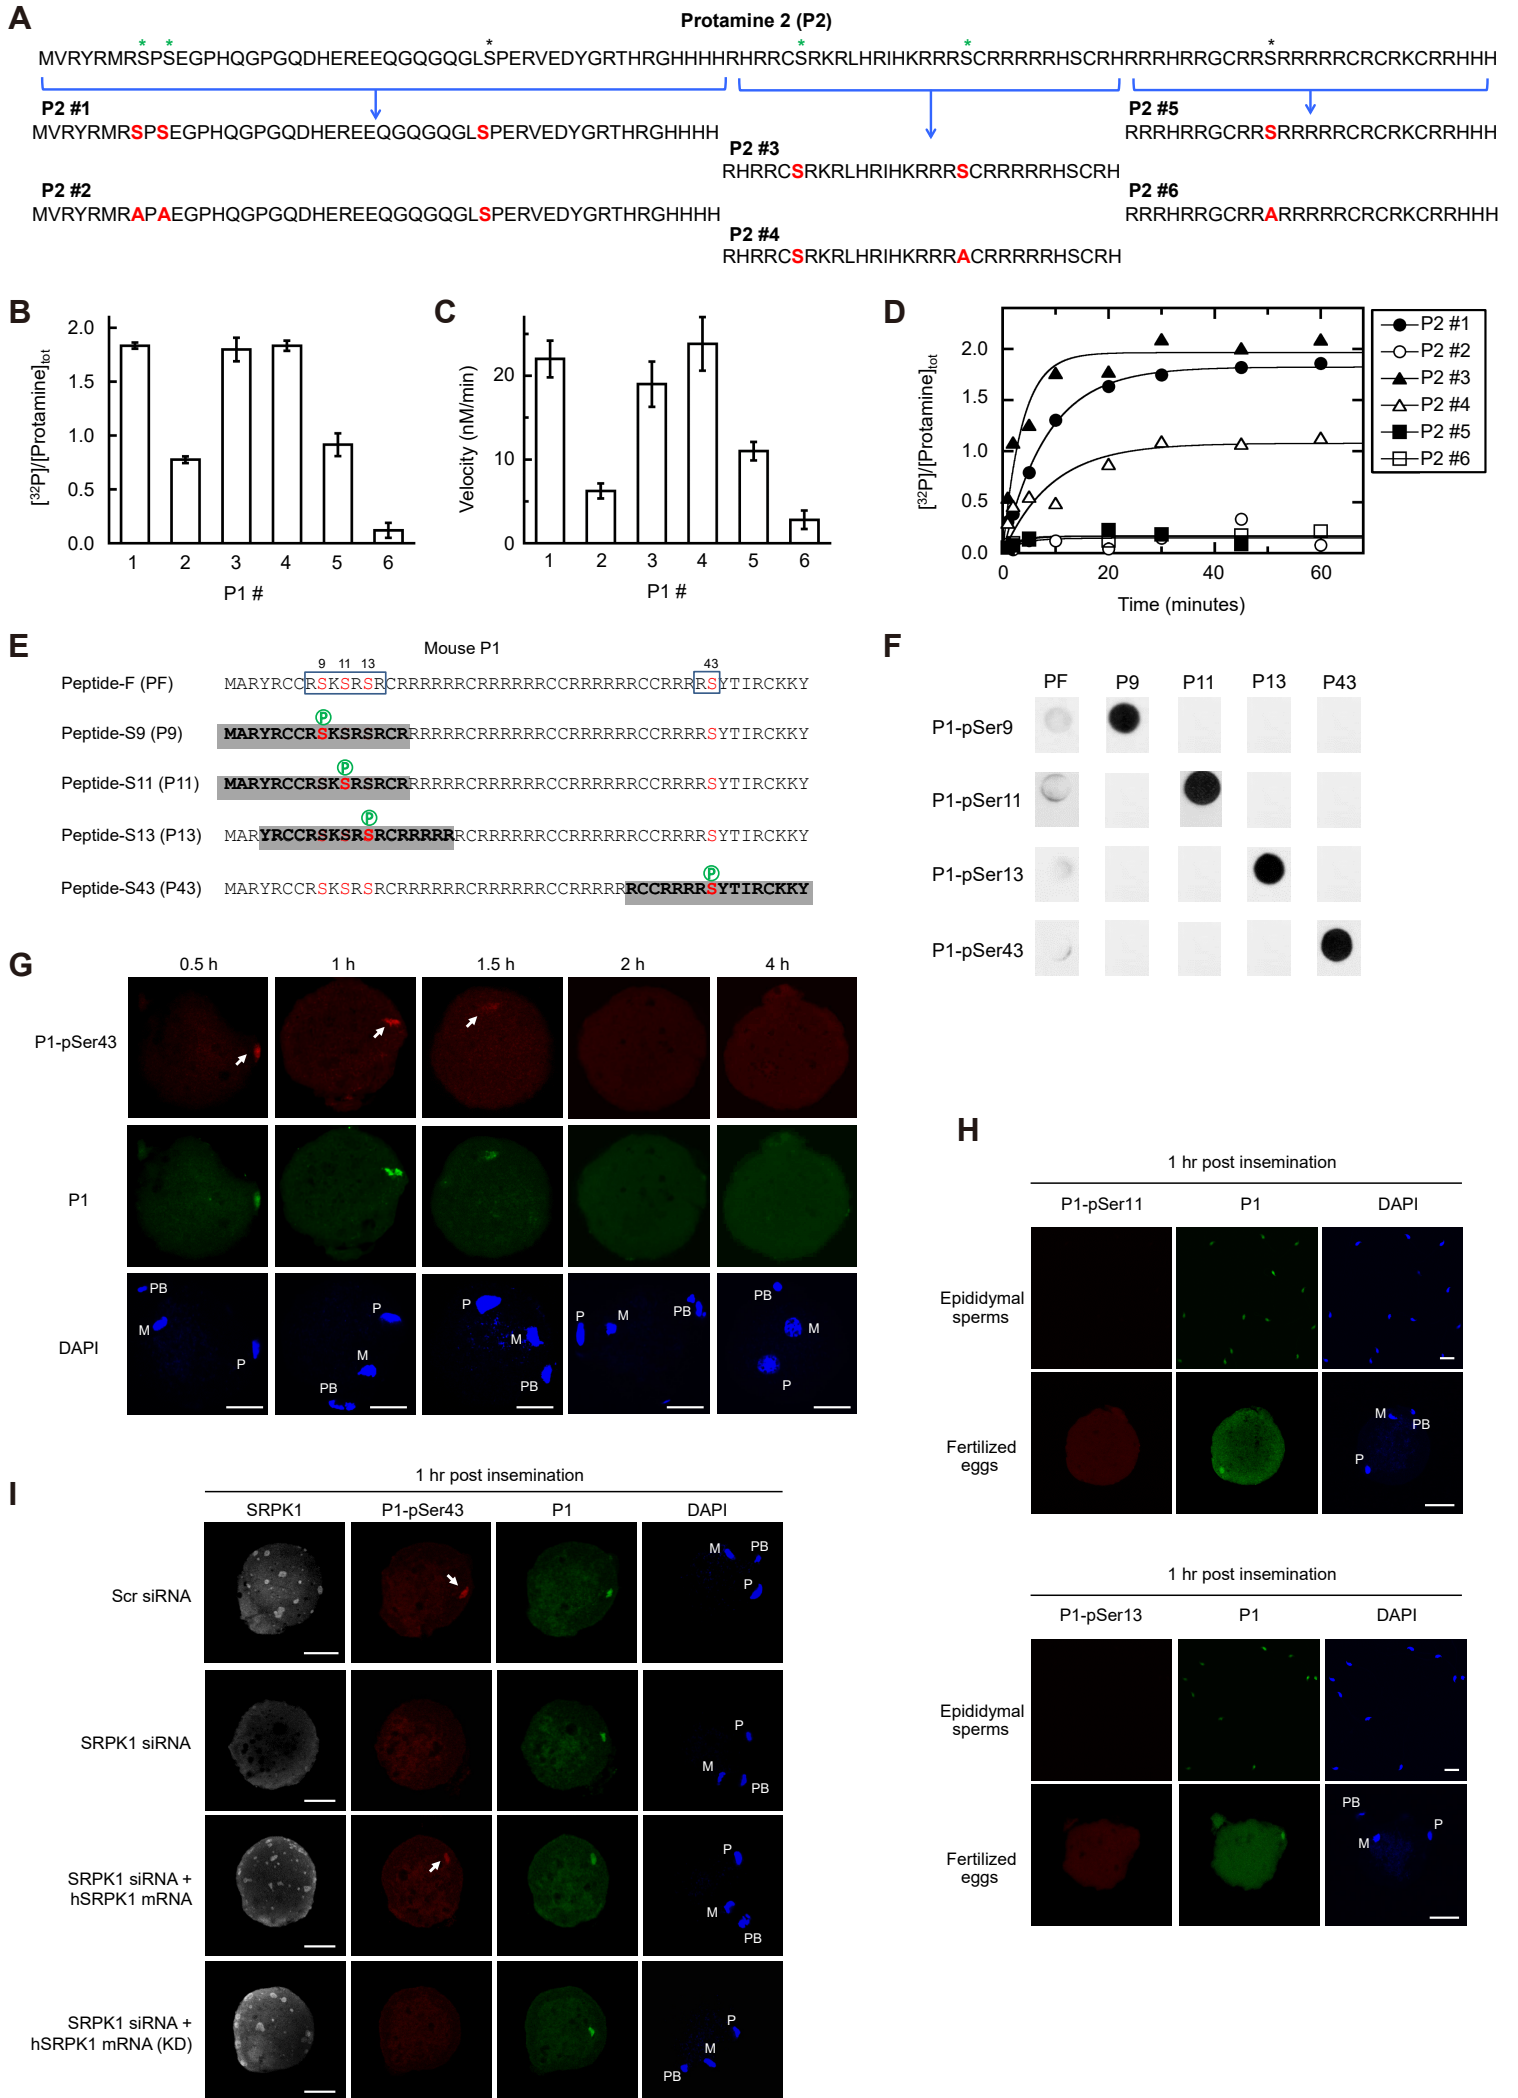

Supplement: NIHMS1569891-supplement-3.pdf [file NIHMS1569891-supplement-3.pdf]

# Supplemental Figure 5

**A**

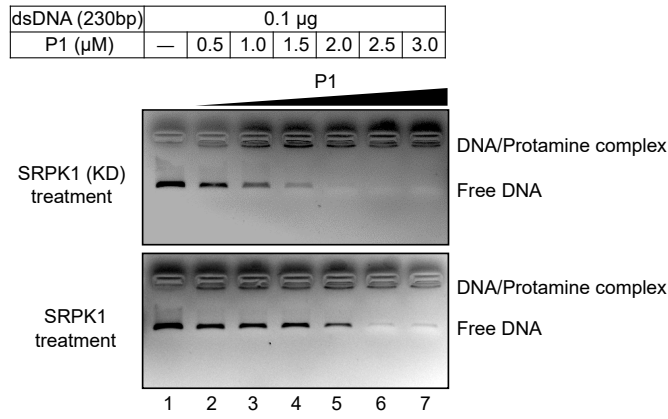

**B**

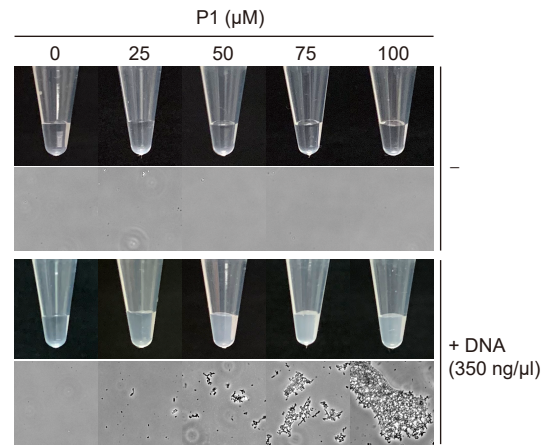

**C**

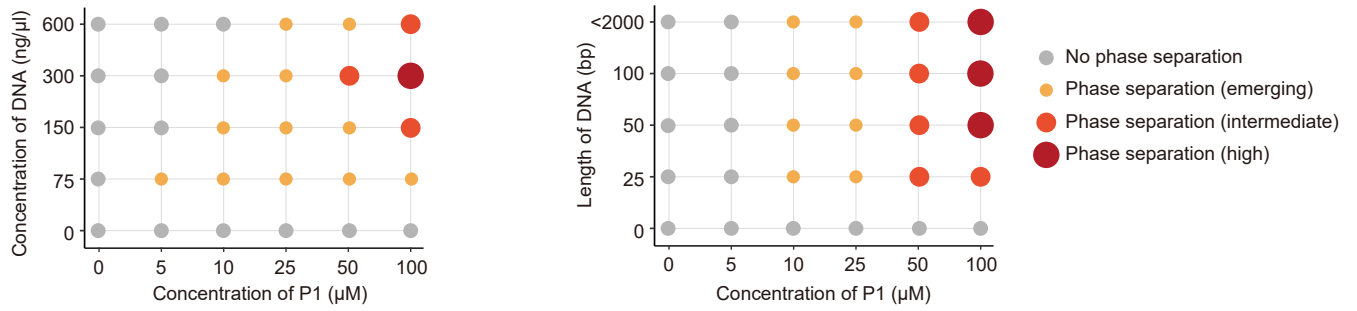

**D**

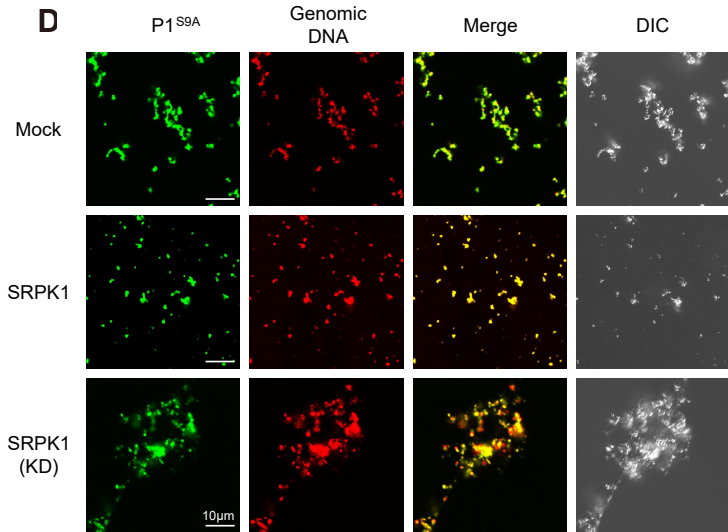

**E**

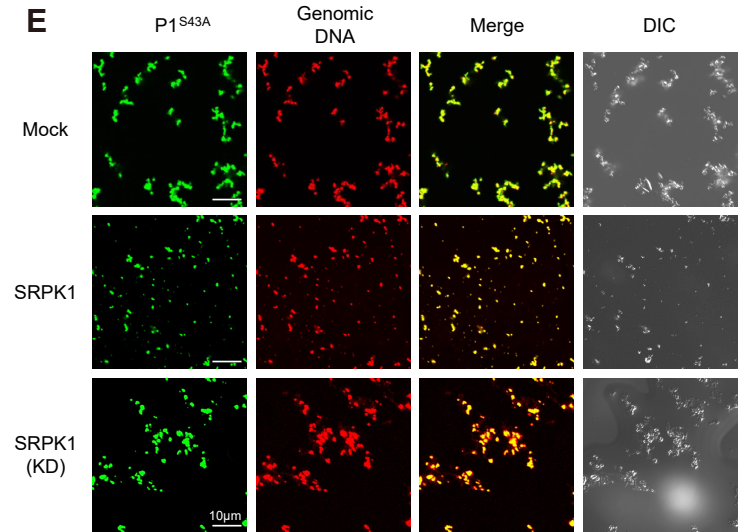

Supplement: NIHMS1569891-supplement-5.pdf [file NIHMS1569891-supplement-5.pdf]

# Supplemental Figure 6

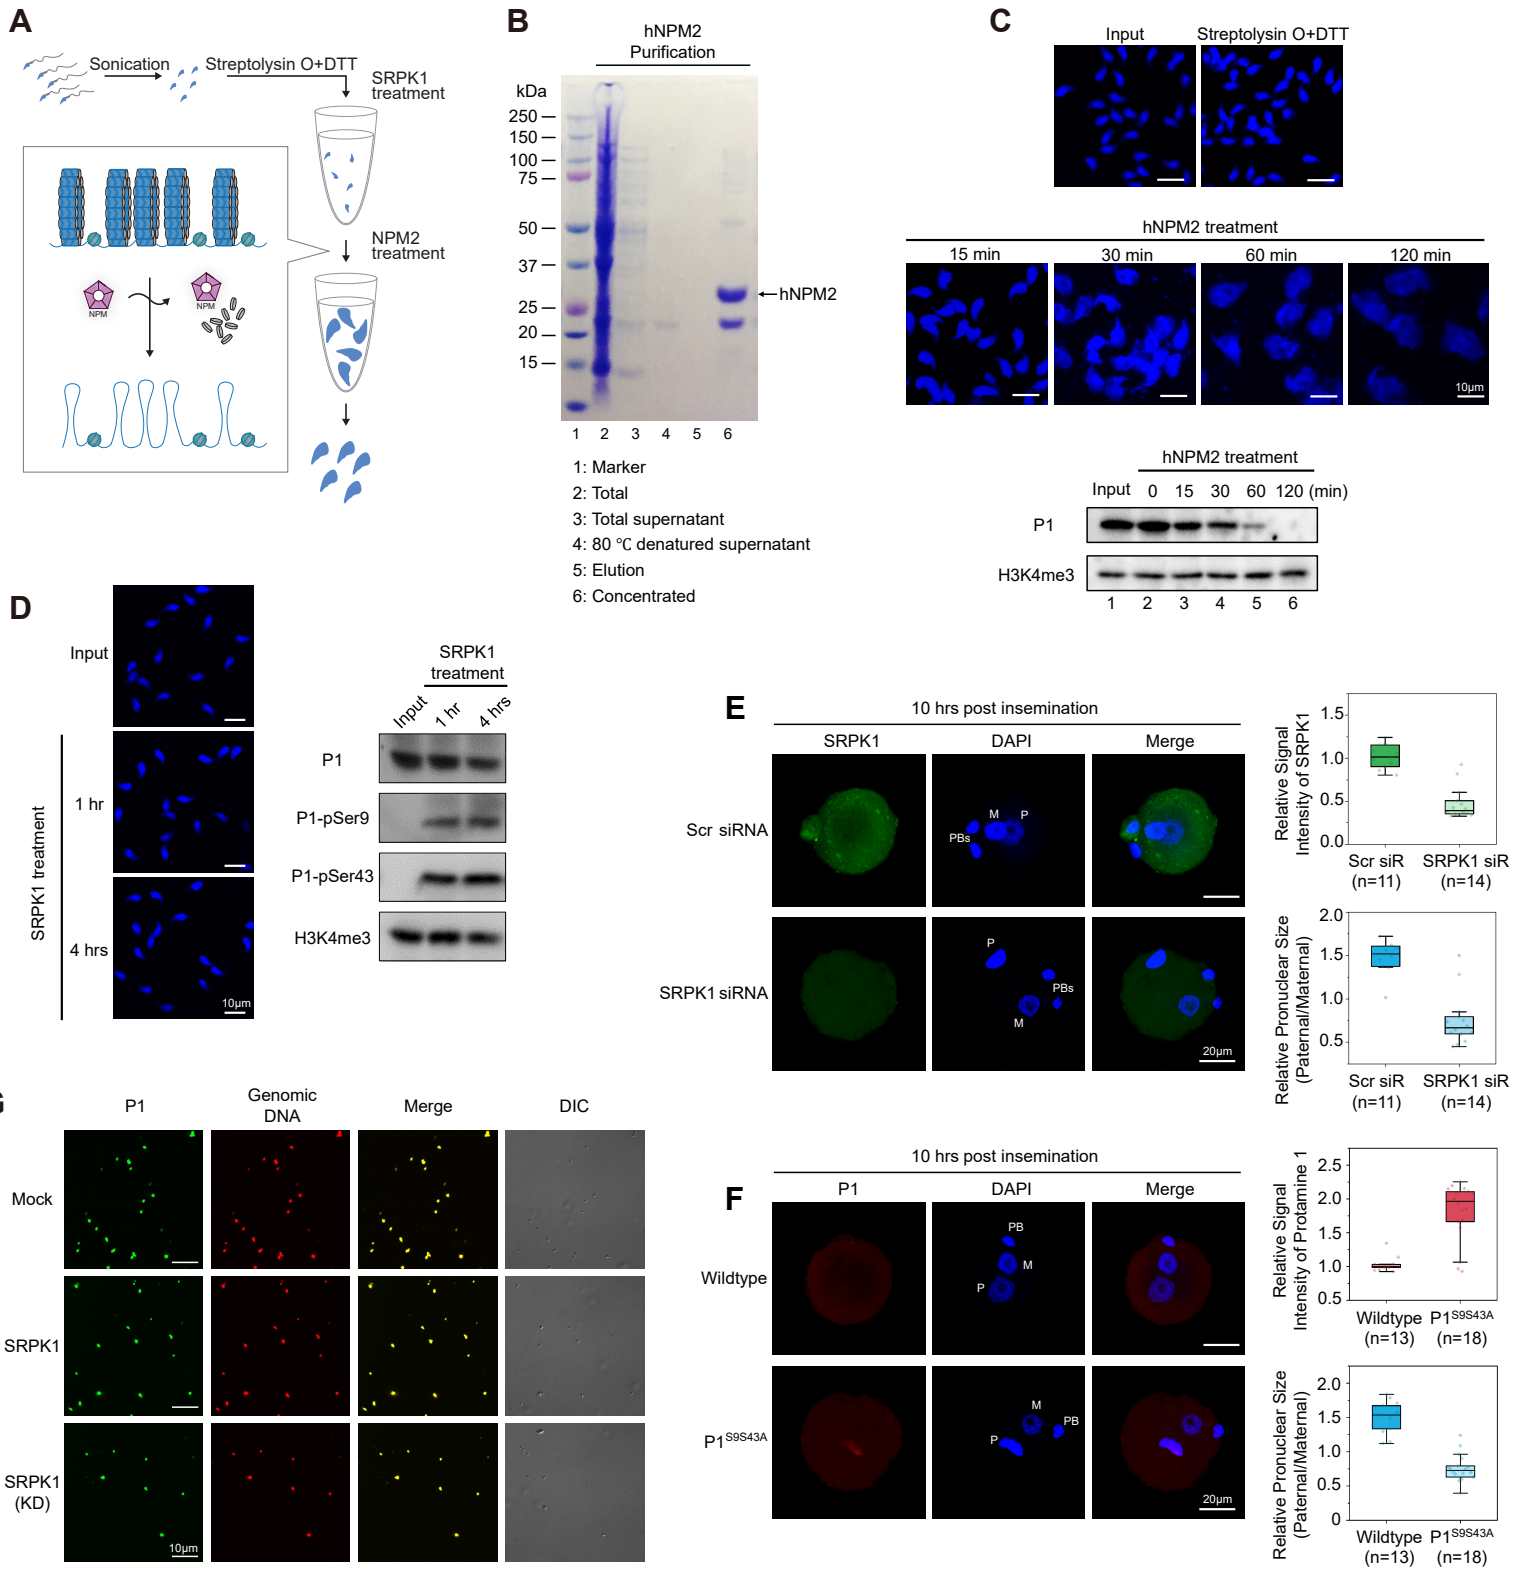

Supplement: NIHMS1569891-supplement-6.pdf [file NIHMS1569891-supplement-6.pdf]
